# Supplementary material for: Self-assembly of near-unity helical Ce1−xMxO2 (x = 0.1, M = Ni and Bi) solid solutions with tunable optical activity
Source: Royal Society of Chemistry journal article supplement (doi:10.1039/c7nj03996d), 2017-12-13
Supplement: c7nj03996d1.pdf [file c7nj03996d1.pdf]

**Electronic Supplementary Information**

**Self-assembly of near-unity helical  $\text{Ce}_{1-x}\text{M}_x\text{O}_2$  ( $x=0.1$ ,  $\text{M}=\text{Ni}$ ,  $\text{Bi}$ ) solid solutions**

**with tuneable optical activity**

*Jing Chen<sup>1, 2</sup>, Songmei Li<sup>1\*</sup>, Juan Du<sup>1</sup>, Jianhua Liu<sup>1</sup>, Mei Yu<sup>1</sup> AND Zhiyong Tang<sup>2\*</sup>*

<sup>1</sup>Key Laboratory of Aerospace advanced materials and performance of Ministry of Education, School of Materials Science and Engineering, Beihang University, Beijing, 100191, P. R. China.

<sup>2</sup>*Chinese Academy of Sciences, National Center for Nanoscience & Technology, Beijing 100190, China*

*Corresponding Authors :*

*\*E-mail: songmei\_li@buaa.edu.cn*

*\*E-mail: zytang@nanoctr.cn*

## 1. Experimental method

### 1.1 Synthesis of $\text{Ce}_{1-x}\text{M}_x\text{O}_2$ nanostructures

All chemical reagents are commercially available and without any further purification. Typically, in the synthesis of helical nanospindles-like  $\text{Ce}_{0.9}\text{Ni}_{0.1}\text{O}_2$ , 6 mmol L-AspNa, 1.8 mmol cerium nitrate and 0.2 mmol nickel nitrate were dissolved in 10 ml deionized water, then 10 mL 0.15 M  $\text{Na}_2\text{CO}_3$  was added to the mixture under stirring. Then stirring gently for 3h, the resulting suspension was hydrothermal treated at 160 °C for 24 h. The as-prepared products were washed with deionized water and ethanol twice, respectively. Then the result black slurry products were stay overnight at 60 °C in air. After calcinated at 450 °C in air for 3 h, a black gray  $\text{CeNiO}_2$  powder was obtained.

For the preparation of  $\text{Ce}_{0.9}\text{Bi}_{0.1}\text{O}_2$  nanospindles, all the other experimental procedures remained the same as described above, except for the nickel nitrate is replaced with bismuth nitrate.

### 1.2 Characterization

The crystallographic phases of the as-prepared samples were detected on a Rikagu D/max 2200PC, with Cu K $\alpha$  radiation ( $\lambda=1.5406$  Å). The morphology of the as-prepared samples was characterized by FE-SEM (FEI SIRION) and transmission electron microscopy (JEOL 2010 FEG). The composition of these samples was measured by inductively coupled plasma-atomic emission spectrometer (ICP-AES, USA Thermo Jarrell-Ash Corp. ICP-9000 (N+M)). Diffuse reflectance ultraviolet visible (DRUV) spectra was performed on a Shimadzu UV-3600 spectropolarimeter. DRCD spectra were recorded by a JASCO J-815 spectropolarimeter.

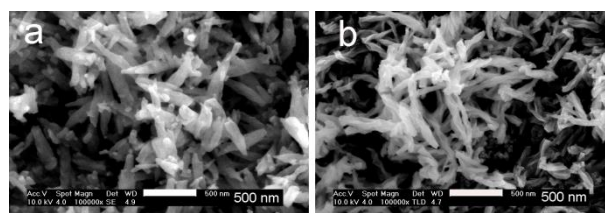

**Figure S1.** SEM images of Ce-compounds obtained after reaction at 160 °C for (a) 1 h and (b) 24 h.

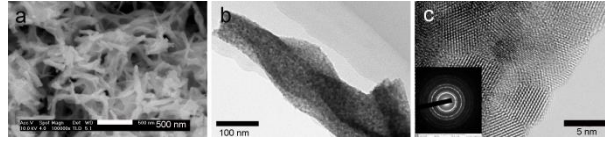

**Figure S2.** SEM images (a), TEM images (b), HRTEM images (c) and SAED (inset in c) of  $\text{Ce}_{0.9}\text{Zn}_{0.1}\text{O}_2$ .

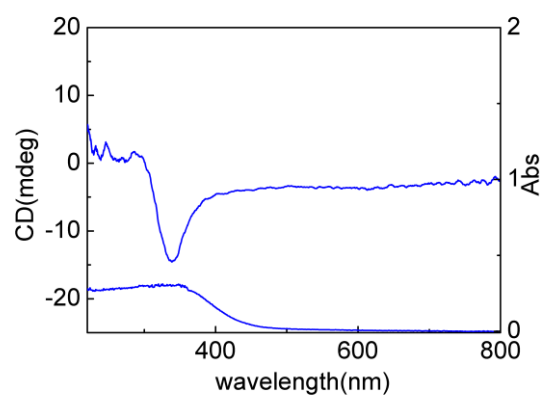

**Figure S3.** DRCD (top) and DRUV-vis (bottom) spectra of  $\text{Ce}_{0.9}\text{Zn}_{0.1}\text{O}_2$ .
